# Supplementary material for: Targeting cancer stem cells in medulloblastoma by inhibiting AMBRA1 dual function in autophagy and STAT3 signalling
Source: PubMed Central journal article supplement (PMC8357694; doi:10.1007/s00401-021-02347-7), 2021-07-24
Supplement: 401_2021_2347_MOESM1_ESM.pdf [file 401_2021_2347_MOESM1_ESM.pdf]

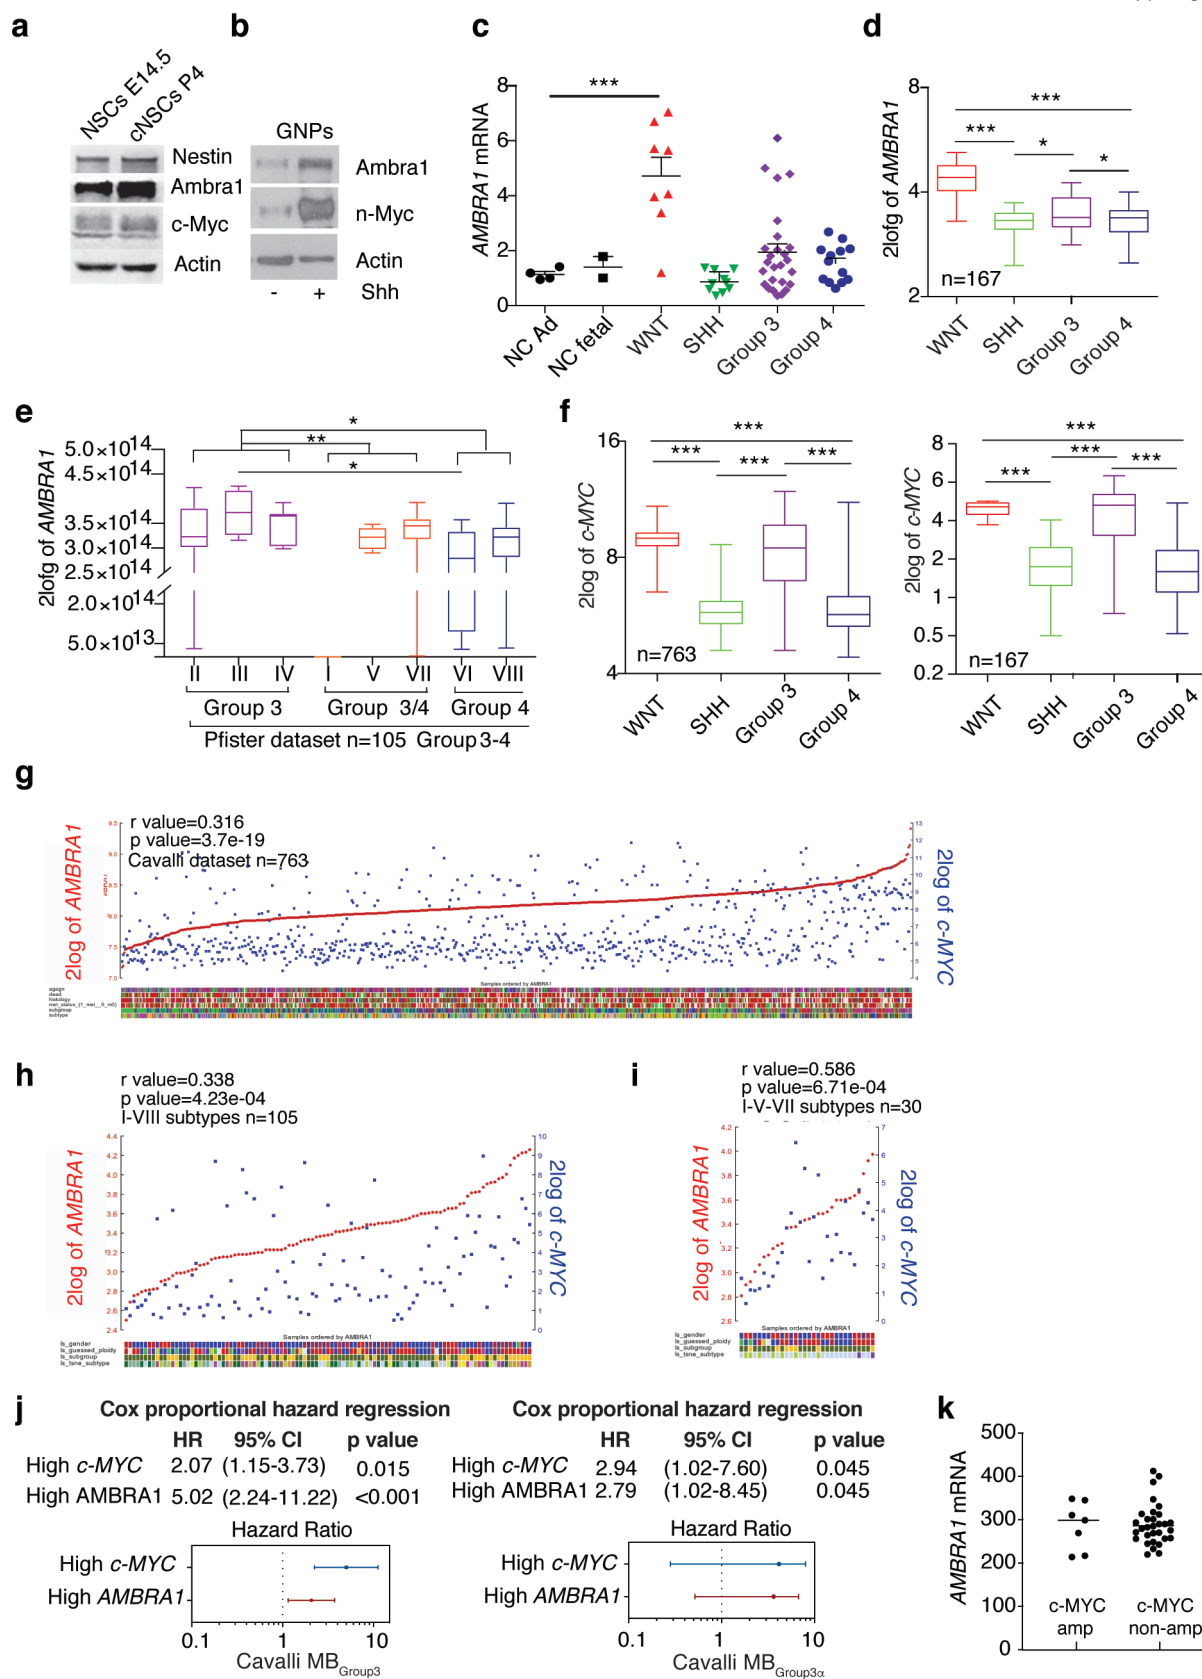

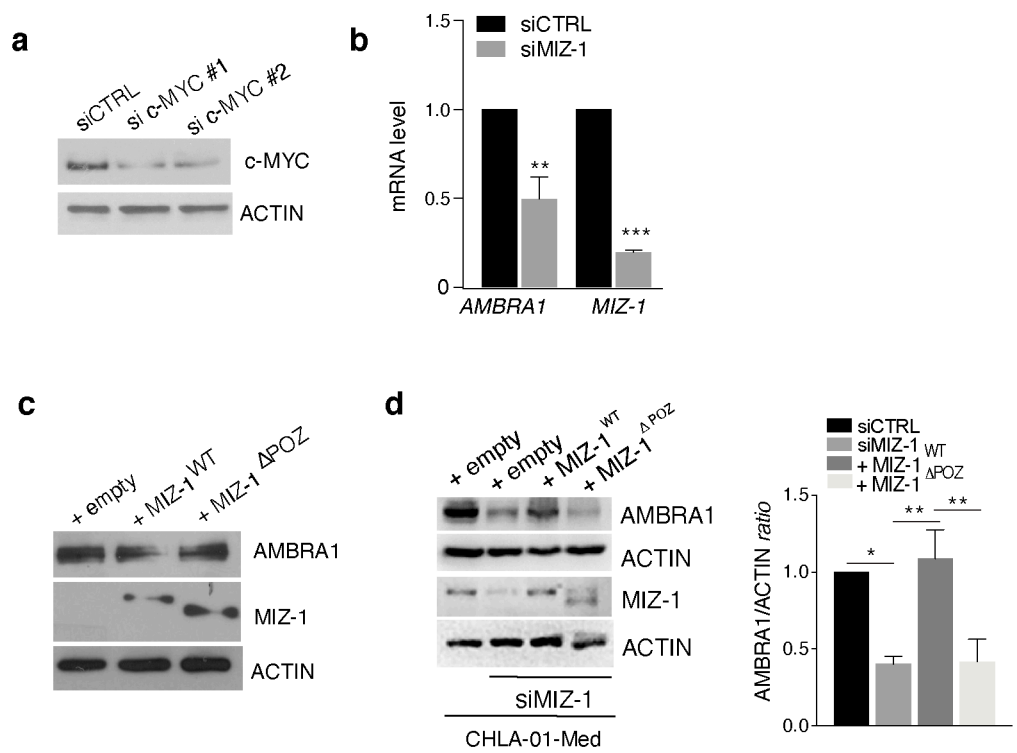

**a**

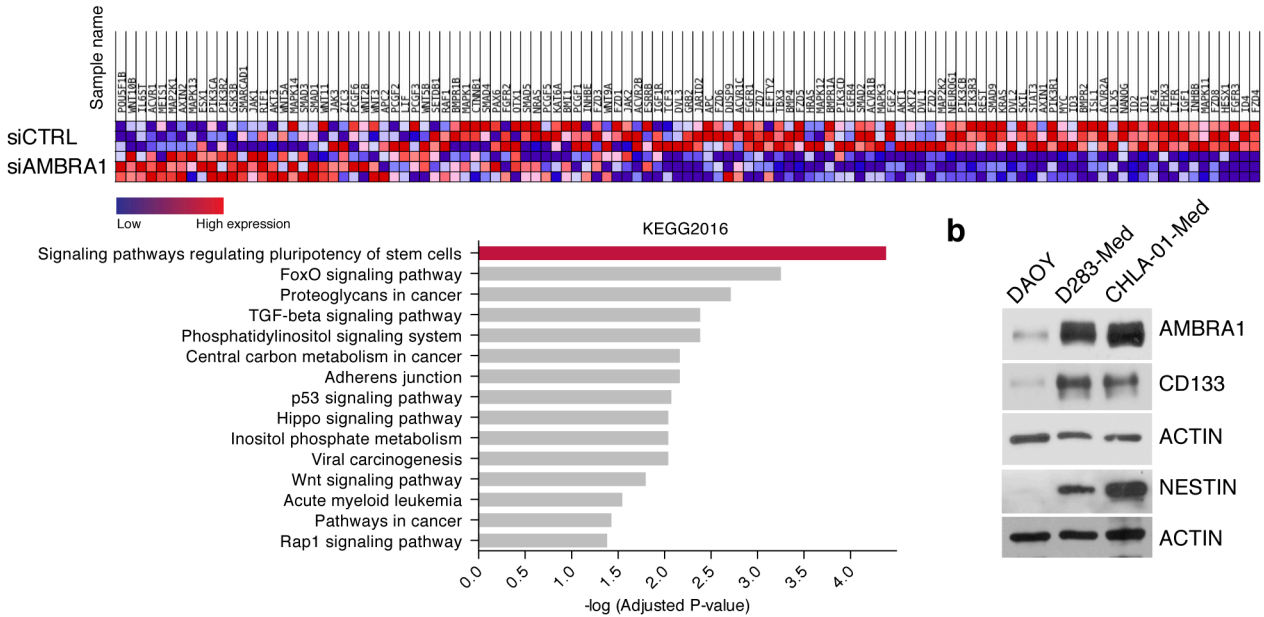

**b**

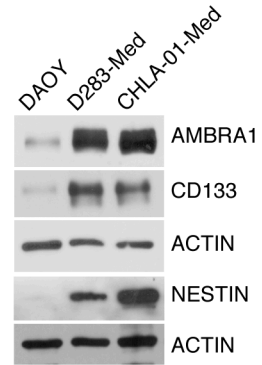

**c**

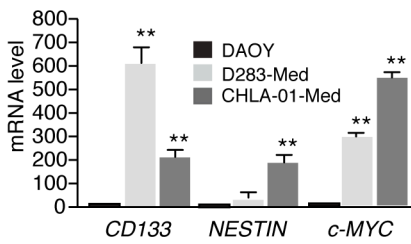

**d**

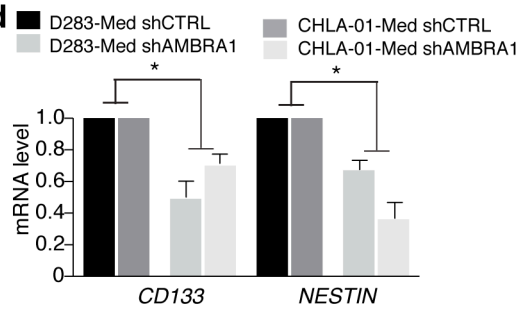

**e**

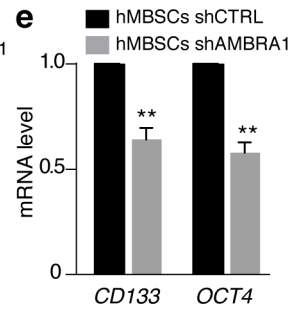

**f**

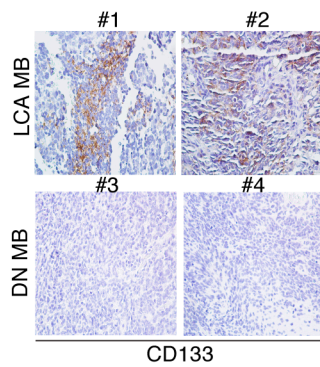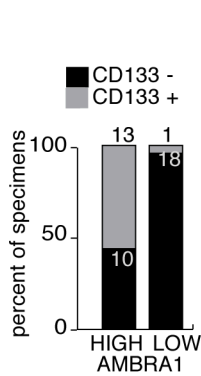

**g**

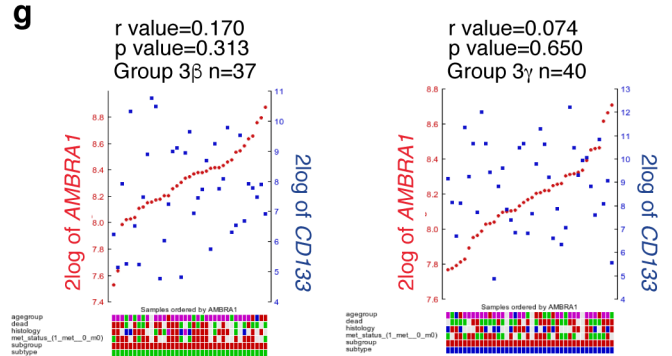

**h**

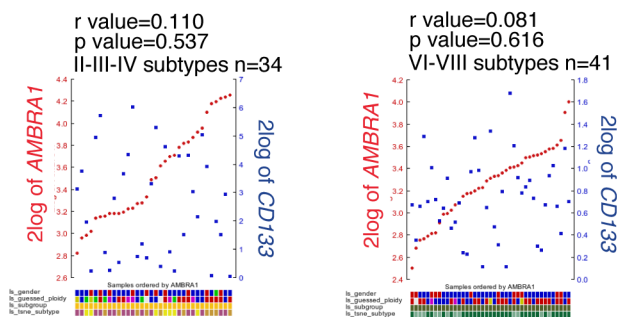

**i**

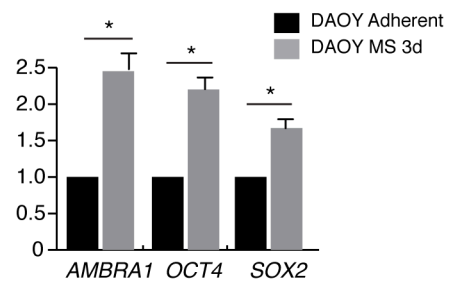

**j**

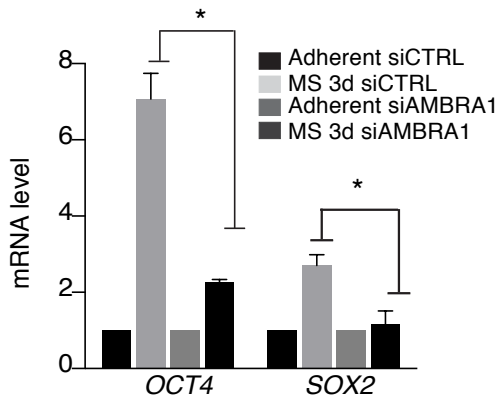

**k**

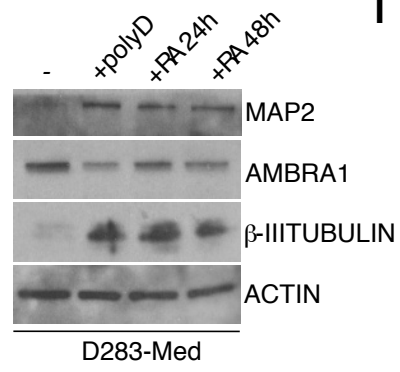

**l**

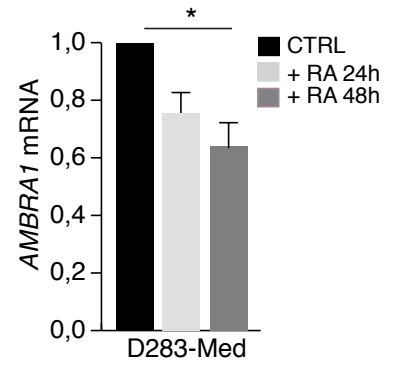

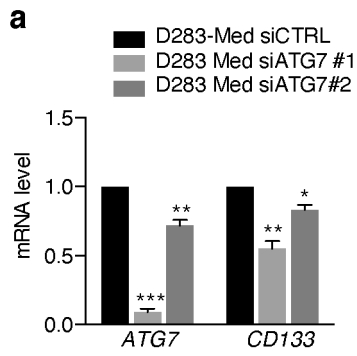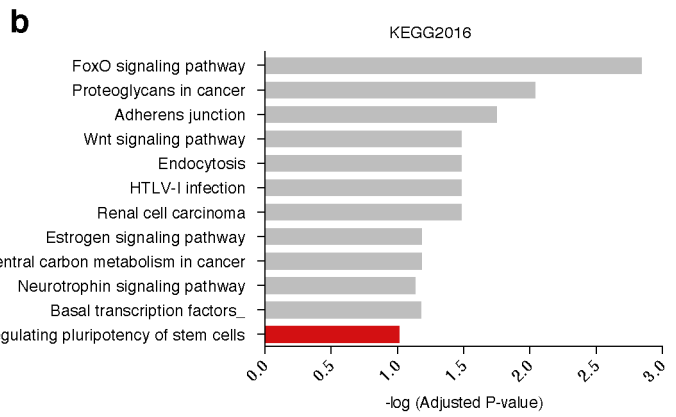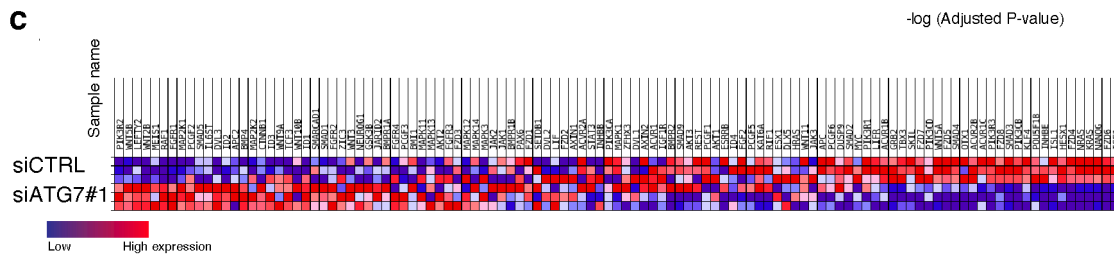

**a**

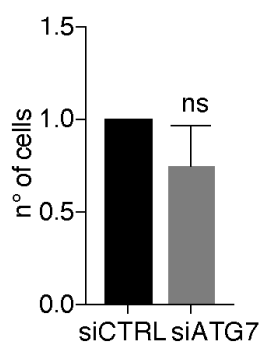

**b**

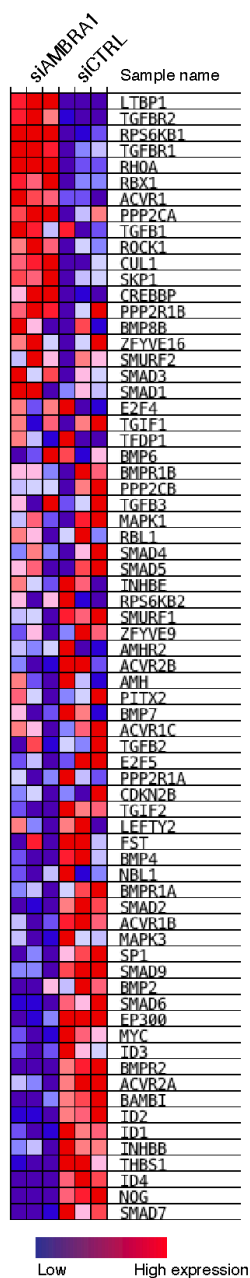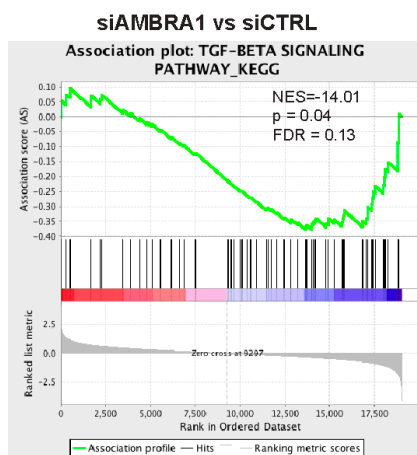

**c**

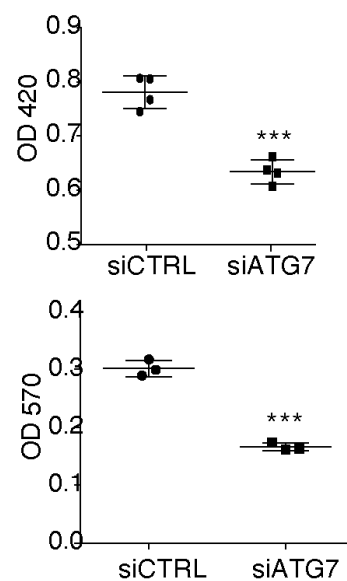

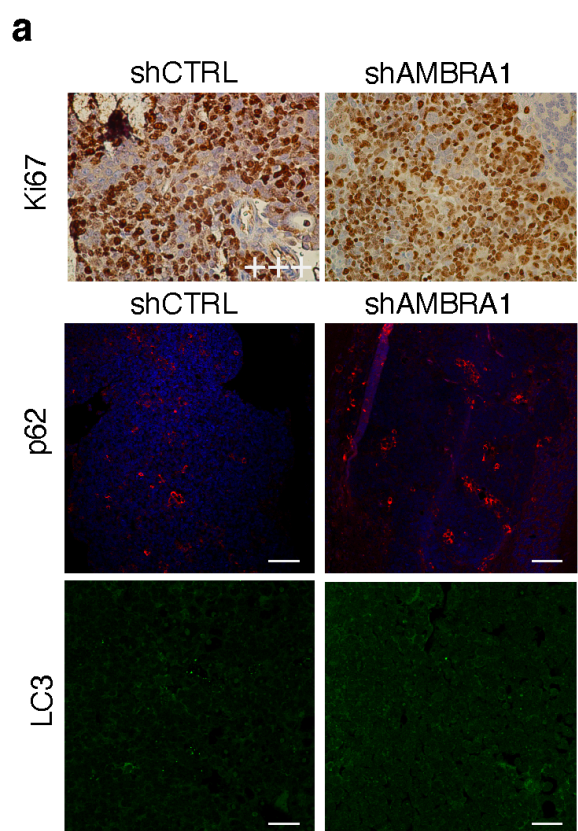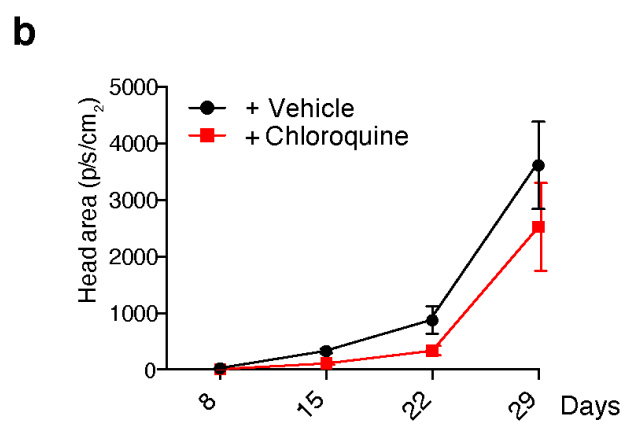

**a**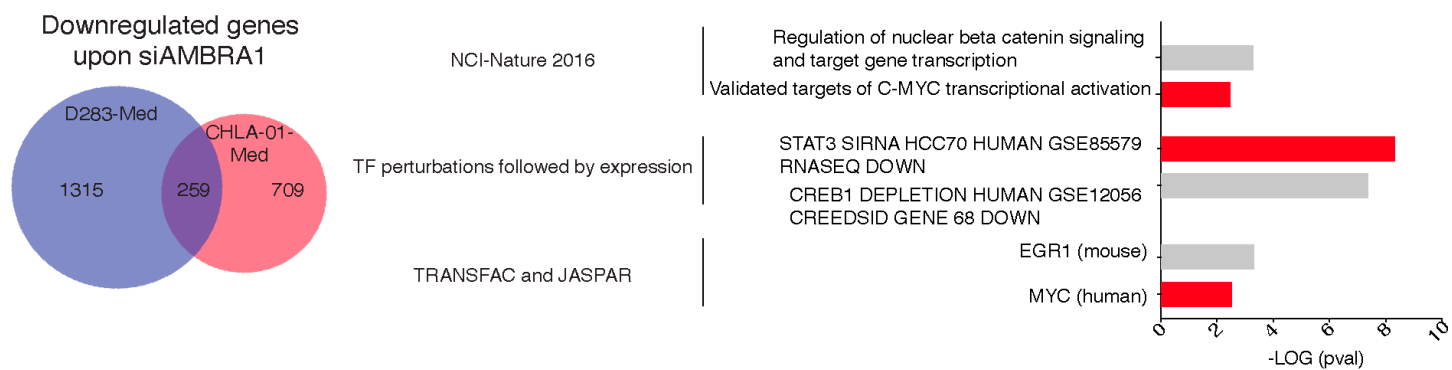**b**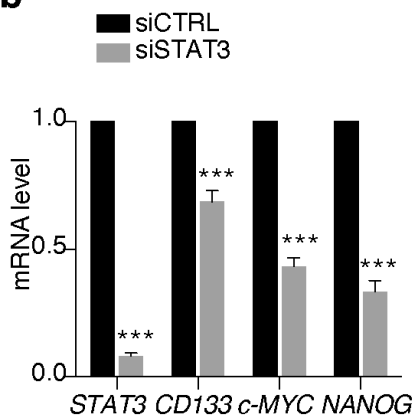**c**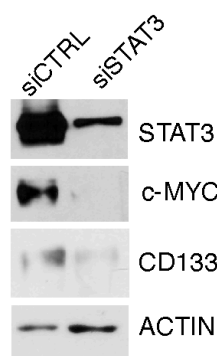**d**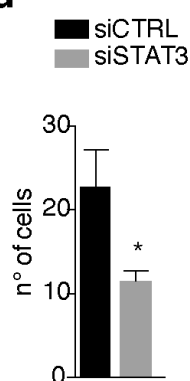**e**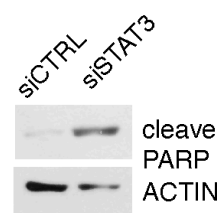**f**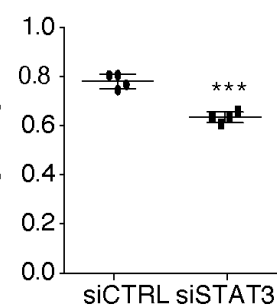**g**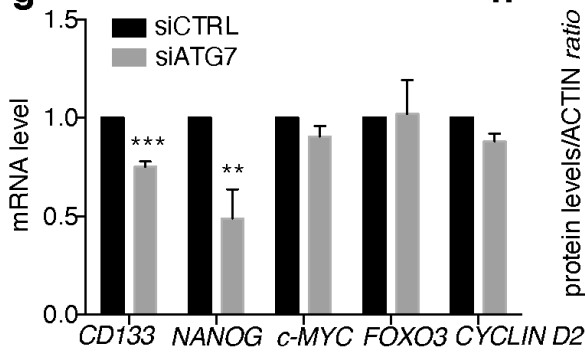**h**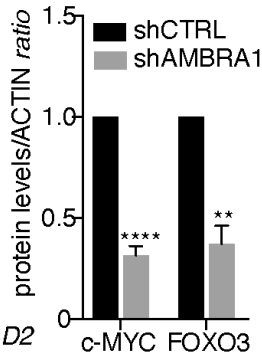**i**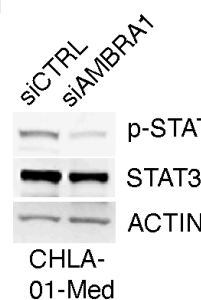**j**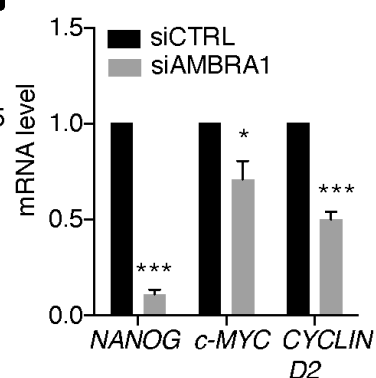**k**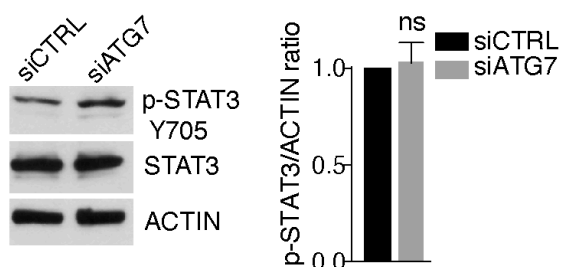**l**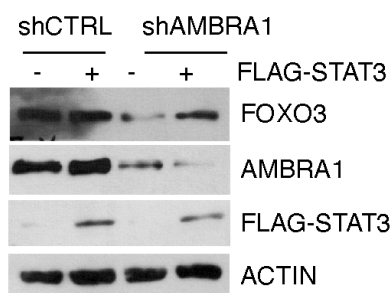**m**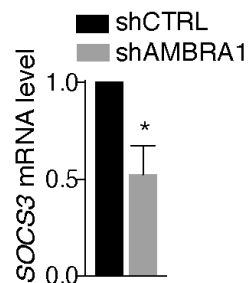**n**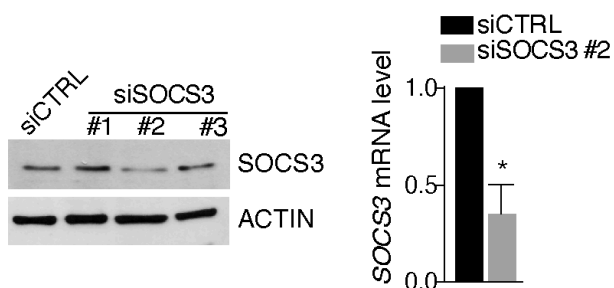



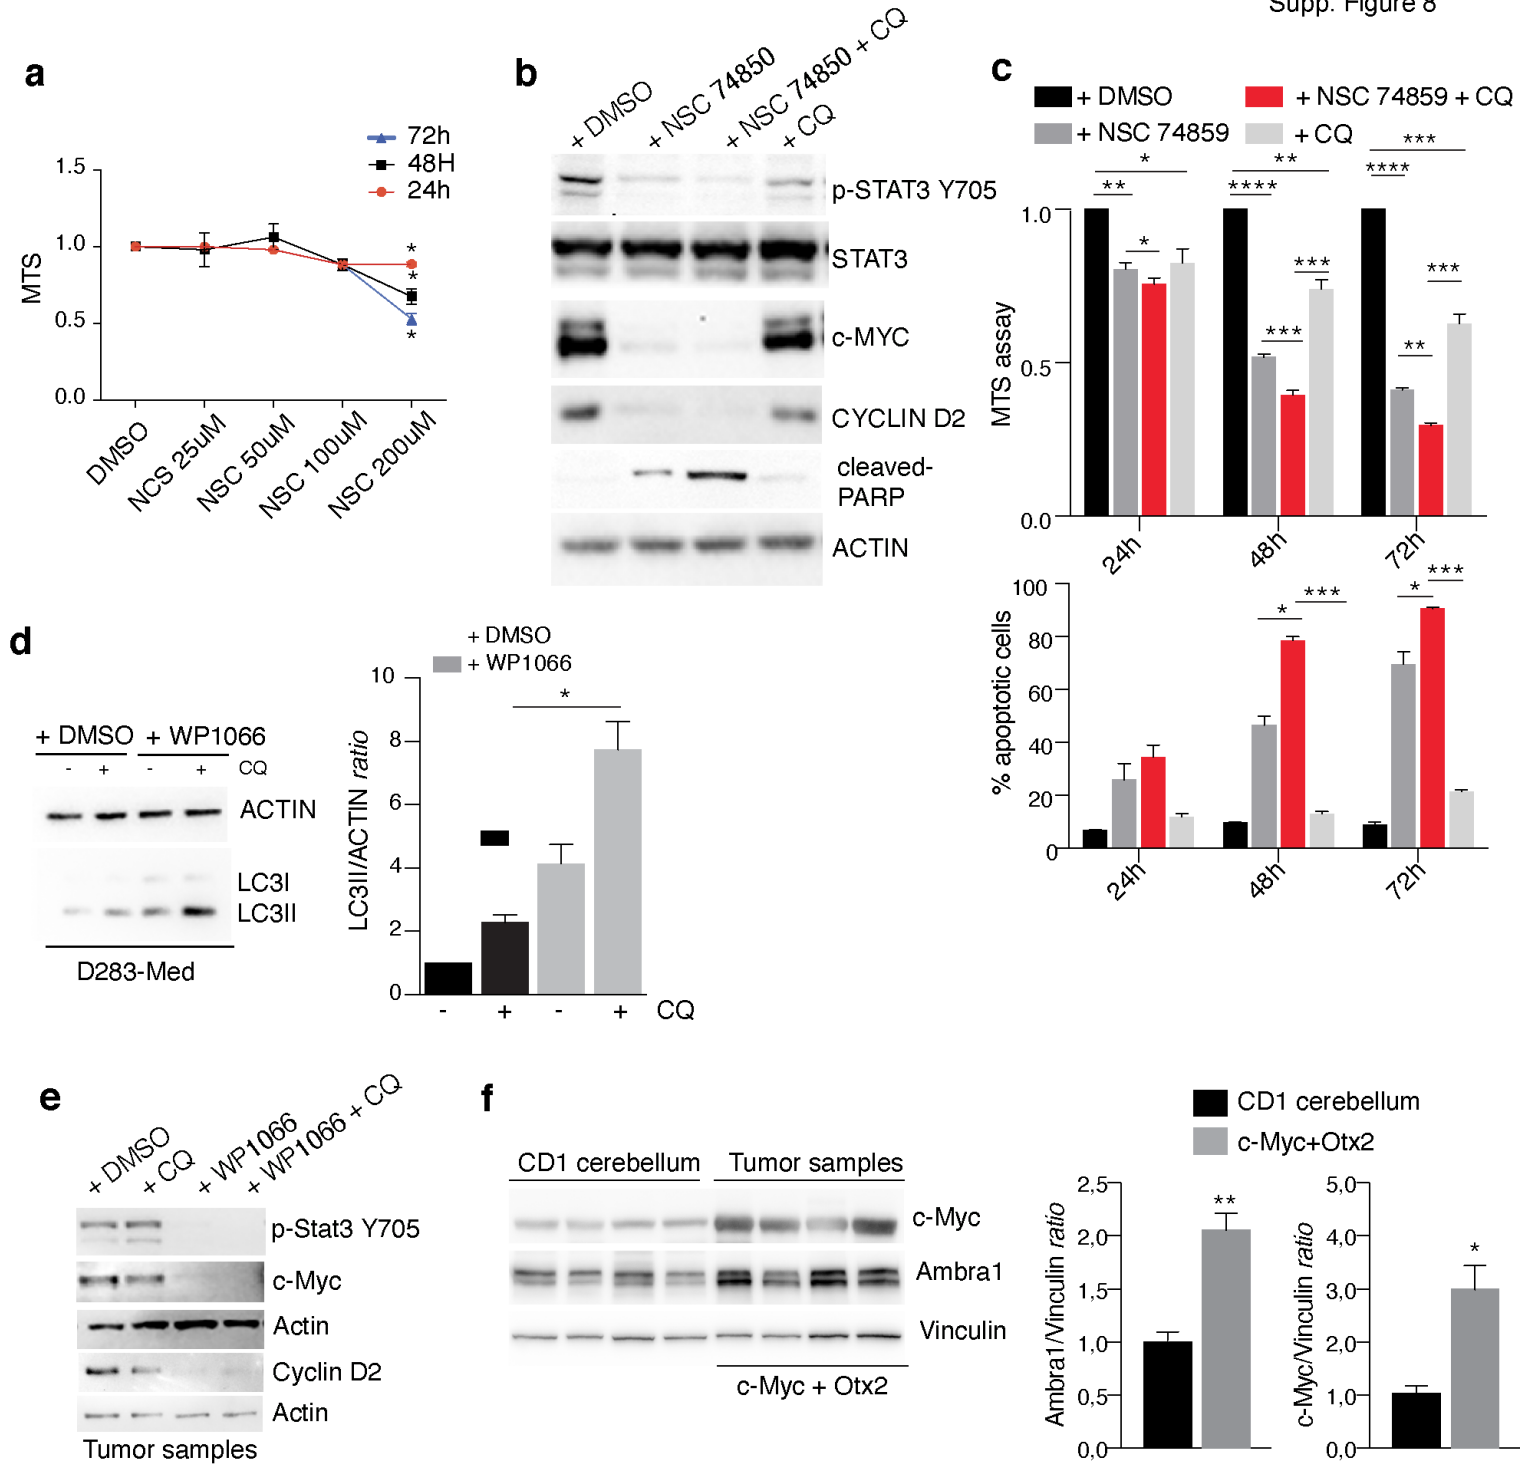

## Supplementary Figure legends

### Supp. Figure 1: *AMBRA1* and *c-MYC* expression in MB tumour samples and cell lines

**a)** Neural stem cells (NSCs) were isolated from Medial Ganglionic Eminences at E14.5 while cerebellar NSCs (cNSCs) were obtained from postnatal 4-day-old wild-type mice (P4). Levels of Nestin, Ambra1, c-Myc and Actin were analysed by WB.

**b)** Cerebellar granule neuron precursors (GNPs) (prepared from 4-day-old mice) were isolated and treated with Shh (3 µg/ml) for up to 72 h. Levels of Ambra1, n-Myc and Actin were analysed by WB.

**c)** qPCR analysis of *AMBRA1* mRNA among adult and fetal cerebellum and in MB patients. Data are expressed as the mean value ± SEM. Data were analysed by one-way analysis of variance (ANOVA) followed by Tukey post-hoc test (\*\*p<0.001).

**d)** RNA log<sub>2</sub> expression of *AMBRA1* derived from the publicly available dataset Pfister (167 samples, fpkm normalized, mb500rs1 chip), grouped according to the molecular subgroup disease variants. Data were analysed by one-way analysis of variance (ANOVA) followed by Tukey post-hoc test (\*p<0.05, \*\*p<0.001).

**e)** RNA log<sub>2</sub> expression of *AMBRA1* derived from the publicly available dataset Pfister (105 samples, fpkm normalized, mb500rs1 chip), grouped according to the 8 molecular subtypes disease variants. Data were analysed by non-parametric ANOVA test (Kruskal-Wallis test) (\*p<0.05, \*\*p<0.01).

**f)** RNA log<sub>2</sub> expression of *c-MYC* derived from two publicly available datasets: Cavalli (763 samples, fpkm normalized, mb500rs1 chip) and Pfister (167 samples, fpkm normalized, mb500rs1 chip), grouped according to the molecular subgroup disease variants. Data were analysed by one-way analysis of variance (ANOVA) followed by Tukey post-hoc test (\*\*p<0.001).

**g)** Gene expression correlation analyses between transcripts for *AMBRA1* and *c-MYC* in MB samples from the Cavalli dataset (n=763 tumour samples). Statistically significant positive correlation is shown between these genes (r=0.316, p=3.7e-19).

**h)** Gene expression correlation analyses between transcripts for *AMBRA1* and *c-MYC* in MB samples from the Pfister dataset (I-VIII subtypes n=105). Statistically significant positive correlation is shown between these genes (r=0.338 p=4.23e-04).

**i)** Gene expression correlation analyses between transcripts for *AMBRA1* and *c-MYC* in MB samples from the Pfister dataset (I-V-VII subtypes n=30 respectively). Statistically significant positive correlation is shown between these genes (r=0.586 p=6.71e-04).

j) Cox proportional hazard regression was used to determine the independent effect of high-level of *AMBRA1* and *c-MYC* expression on overall survival (OS) in MB<sub>Group3</sub> and in G3 $\alpha$  respectively from Cavalli dataset.

k) *AMBRA1* expression in G3 $\gamma$  subtype (derived from Cavalli dataset), divided according to the *c-MYC* amplification status.

**Supp. Figure 2: Role of c-MYC/MIZ-1 complex in regulating *AMBRA1* expression *in vitro***

a) *c-MYC* expression was downregulated in D283-Med cells using two different RNAi oligonucleotides (si-MYC#1,#2) or unrelated oligos as negative control (siCTRL). Levels of *c-MYC* and ACTIN were analysed by WB.

b) MIZ-1 expression was downregulated in D283-Med cells using specific RNAi oligonucleotides (siMIZ-1). Both *AMBRA1* and *MIZ-1* mRNA levels were analysed by qPCR. *GADPH* and *B2M* were used as internal control. Data are expressed as the mean value  $\pm$  SEM (n= 3). siCTRL was arbitrarily defined as 1.00. Data were analysed by unpaired Student's t-test (\*\*p<0.01, \*\*\*p<0.001).

c) D283-cells were transfected with empty, MIZ-1<sup>WT</sup> or MIZ-1 <sup>$\Delta$ POZ</sup> plasmids respectively. Levels of *AMBRA1*, MIZ-1 and ACTIN were analysed by WB.

d) MIZ-1 expression was downregulated in CHLA-01-Med cells using specific RNAi oligonucleotides (siMIZ-1). Then, some of them were transfected with empty, MIZ-1<sup>WT</sup> or MIZ-1 <sup>$\Delta$ POZ</sup> plasmids respectively. Levels of *AMBRA1*, MIZ-1 and ACTIN were analysed by WB. Densitometric analysis of *AMBRA1* levels over ACTIN is also shown. Data are expressed as the mean  $\pm$  SEM (n= 4) and analysed by one-way analysis of variance (ANOVA) followed by Tukey post-hoc test (\*p<0.05; \*\*\*\*p<0.01).

**Supp. Figure 3: Analyses of *AMBRA1*-dependent role in MB stem potential**

a) A heatmap showing the expression of representative pluripotency-related genes in D283-Med cells with or without *AMBRA1* knockdown (si*AMBRA1*). Data are generated from RNA-seq analysis. Below, KEGG enrichment analysis of differentially expressed pathways in *AMBRA1*-depleted cells. Data are generated from RNA-seq.

b) *AMBRA1*, CD133, NESTIN and ACTIN protein levels were analysed by WB respectively in different MB cell lines.

c) qPCR of *CD133*, *NESTIN* and *c-MYC* in different MB cell lines. Both *GADPH* and *B2M* are used as internal control. Data are expressed as the mean value  $\pm$  SEM (n= 3). Data

were analysed by one-way analysis of variance (ANOVA) followed by Tukey post-hoc test. (\*\* $p < 0.01$ ).

**d)** qPCR analyses of *CD133* and *NESTIN* in both D283-Med and CHLA-01-Med depleted for *AMBRA1* (si*AMBRA1*). Data are expressed as the mean value  $\pm$  SEM ( $n = 3$ ). Data were analysed unpaired Student's t-test

**e)** qPCR analyses of *CD133* and *OCT4* in primary human MBSCs after *AMBRA1* lentiviral downregulation (sh*AMBRA1*). Data are expressed as the mean value  $\pm$  SEM ( $n = 3$ ). Data were analysed unpaired Student's t-test.

**f)** Representative IHC images in low magnification fields (40X) showed *CD133* expression in two human desmoplastic/nodular (DN) and large cell/anaplastic (LCA) MBs respectively. Graphical display of IHC data for high or low *AMBRA1* expression relative to level of *CD133* is also shown (right).

**g-h)** Gene expression correlation analyses between transcripts for *AMBRA1* and *CD133* in MB samples from both the Cavalli ( $G3\beta$  and  $G3\gamma$ ) and the Pfister (II+III+IV and VI+VIII subtypes) datasets respectively.

**i)** DAOY cells were cultured as MS for 3 days, *AMBRA1*, *OCT4* and *SOX2* mRNA levels were analysed by Real-time PCR. *GADPH* and *B2M* were used as internal control. Data are expressed as the mean  $\pm$  SEM ( $n = 3$ ) and analysed by unpaired Student's t-test ( $*p < 0.05$ ).

**j)** *AMBRA1* expression was downregulated in DAOY cells using specific RNAi oligonucleotides (si*AMBRA1*) or unrelated oligos as negative control (siCTRL). After 24h, cells were cultured as medullospheres. Both *SOX2* and *OCT4* mRNA levels were analysed by qRT-PCR. *GADPH* and *B2M* were used as internal control. Data are expressed as the mean value  $\pm$  SEM ( $n = 3$ ). Data were analysed by one-way analysis of variance (ANOVA) followed by Tukey post-hoc test. ( $*p < 0.05$ ).

**k)** D283-Med cells were treated by retinoic acid (RA) for two different time points. Levels of *AMBRA1*, *MAP2*,  $\beta$ -III TUBULIN and *ACTIN* were analysed by WB.

**l)** D283-Med cells were treated as in (i). *AMBRA1* expression was analysed. *GADPH* and *B2M* were used as internal control. Data are expressed as the mean  $\pm$  SEM ( $n = 3$ ) and analysed by unpaired Student's t-test ( $*p < 0.05$ ).

#### **Supp. Figure 4: Correlation between autophagy and stem potential**

**a)** qPCR analyses of *CD133* and *ATG7* in D283-Med cells after *ATG7* downregulation with two different specific siRNAs (*ATG7*#1,#2). Both *GADPH* and *B2M* were used as internal

control. Data are expressed as the mean value  $\pm$  SEM (n= 3). Data were analysed by unpaired Student's t-test (\*p<0.05, \*\*p<0.01).

**b)** KEGG enrichment analysis of differentially expressed pathways in ATG7-depleted cells. Data are generated from RNA-seq.

**c)** A heatmap showing the expression of representative pluripotency-related genes in D283-Med cells with or without ATG7 knockdown. Data are generated from RNA-seq analysis.

### **Supp. Figure 5: Role of both AMBRA1 and autophagy in MB proliferation and migration**

**a)** Proliferation was assessed by MTS assay in ATG7-depleted D283-Med cells. Data are expressed as the mean  $\pm$  SEM (n= 3) and analysed by unpaired Student's t-test. ns= no significant.

**b)** A heatmap showing the expression of representative TGF- $\beta$  signalling genes in D283-Med cells with or without AMBRA1 knockdown. Data are generated from RNA-seq analysis. Right, GSAA enrichment plot showing that loss of AMBRA1 in D283-Med cells (3 independent experiments) results in downregulation of TGF- $\beta$  pathway.

**c)** D283-Med cells were treated as in (a) and then plated for both migration and invasion assay. Data are expressed as the mean value  $\pm$  SEM (n= 4). Data were analysed by unpaired Student's t-test (\*\*p<0.001).

### **Supp. Figure 6: Role of both AMBRA1 and autophagy in MB aggressiveness *in vivo***

**a)** Representative immunohistochemistry (40X) and immunofluorescence (20X) respectively with indicated antibodies of paraffin-embedded cerebellar tumours generated by implanting D283-Med-Luc cells (shCTRL or shAMBRA1) into the fourth ventricle of nude mice.

**b)** Tumour growth according to quantified photon emission (ph/s) from the region of interest of mice analysed in Figure 6f. Data are the mean  $\pm$  SEM (n= 5) and analysed by one-way analysis of variance (ANOVA) followed by Tukey post-hoc test.

### **Supp. Figure 7: Analysis of the crosstalk among STAT3, AMBRA1 and autophagy in MB<sub>Group3</sub> cells**

**a)** Left. Venn diagram for downregulated expressed genes (padj<0.05) in both D283-Med and CHLA-01-Med cells, after AMBRA1 downregulation by specific RNAi oligonucleotides (siAMBRA1). Right. We used the gene-set enrichment tool Enrichr to analyse common downregulated genes between the two cells lines, interrogating "TRANSFAC and JASPAR",

“Transcriptional factor perturbations Followed by Expression” and “NCI-Nature 2016” database. Per each group, only the two top results are shown.

**b)** *CD133*, *NANOG*, *c-MYC* and *STAT3* mRNA levels were analysed in D283-Med cells after *STAT3* downregulation by specific RNAi oligonucleotides (si*STAT3*) or unrelated oligos as negative control (siCTRL). Data are expressed as the mean value  $\pm$  SEM (n= 3). Data were analysed by unpaired Student's t-test (\* $p < 0.05$ , \*\*\* $p < 0.001$ ).

**c)** D283-Med cells were treated as in **(b)**. Levels of *STAT3*, *c-MYC*, *CD133* and *ACTIN* were analysed by WB.

**d)** D283-Med cells were treated as in **(b)**. After 48h, cells were counted. Data are expressed as the mean value  $\pm$  SEM (n= 3). Data were analysed by unpaired Student's t-test (\* $p < 0.05$ ).

**e)** D283-Med cells were treated as in **(b)**. Levels of cleaved-PARP and *ACTIN* were analysed by WB.

**f)** D283-Med cells were treated as in **(b)** and then plated for migration assay. Data are expressed as the mean value  $\pm$  SEM (n= 4). Data were analysed by unpaired Student's t-test (\*\*\* $p < 0.001$ ).

**g)** qPCR analyses of *CD133*, *NANOG*, *c-MYC*, *FOXO3*, and *CYCLIN D2* in D283-Med cells after *ATG7* downregulation (si*ATG7*). Both *GADPH* and *B2M* were used as internal control. Data are expressed as the mean value  $\pm$  SEM (n= 3). Data were analysed by unpaired Student's t-test (\* $p < 0.05$ , \*\*\* $p < 0.001$ ).

**h)** Densitometric analyses (related to Fig. 7b) of both *c-MYC* and *FOXO3* over *ACTIN* are shown (right panel). Data are expressed as the mean  $\pm$  SEM (n= 3) and analysed by unpaired Student's t-test (\*\* $p < 0.01$ , \*\*\* $p < 0.001$ )

**i)** *AMBRA1* was downregulated by specific RNAi oligonucleotides (si*AMBRA1*) or unrelated oligos as negative control (siCTRL) in CHLA-01-Med cells. Levels of *STAT3*, p-*STAT3* and *ACTIN* were analysed by WB.

**j)** *NANOG*, *c-MYC* and *CYCLIN D2* mRNA levels were analysed in CHLA-01-Med cells after *AMBRA1* downregulation by specific RNAi oligonucleotides (si*STAT3*) or unrelated oligos as negative control (siCTRL). Data are expressed as the mean value  $\pm$  SEM (n= 3). Data were analysed by unpaired Student's t-test (\* $p < 0.05$ , \*\*\* $p < 0.001$ ).

**k)** D283-Med cells were treated as in **(g)**. Levels of *STAT3*, p-*STAT3* and *ACTIN* were analysed by WB. Densitometric analysis of p-*STAT3* levels over *ACTIN* is also shown (right panel).

**l)** *AMBRA1* expression was downregulated by lentiviral infection (shRNA *AMBRA1*) or negative control (shRNA CTRL). Then, some of them were transfected with empty or

STAT3-FLAG plasmids respectively. Levels of AMBRA1, FOXO3, STAT3 and ACTIN were analysed by WB.

**m)** SOCS3 expression was analysed in AMBRA1-depleted D283-Med cells. Both *GADPH* and *B2M* were used as internal control. Data are expressed as the mean value  $\pm$  SEM (n= 3). Data were analysed by unpaired Student's t-test (\*p<0.05).

**n)** SOCS3 expression was downregulated in D283-Med cells using three different RNAi oligonucleotides (sic-SOCS3#1,#2, #3) or unrelated oligos as negative control (siCTRL). Levels of SOCS3 and ACTIN were analysed by WB. SOCS3 expression was analysed in SOCS3#2-depleted D283-Med cells. *GADPH* was used as internal control. Data are expressed as the mean value  $\pm$  SEM (n= 3). Data were analysed by unpaired Student's t-test (\*p<0.05).

### **Supp. Figure 8: Both STAT3 and autophagy inhibition affects MB cells survival and autophagy**

**a)** D283-Med cells were treated with a range of NSC 74859 concentrations (NSC, 25 200  $\mu$ M) and proliferation was monitored by MTS assay. MTS assay. Data are expressed as the mean  $\pm$  SEM (n= 3) and data were analysed by one-way analysis of variance (ANOVA) followed by Tukey post-hoc test. (\*p<0.05)

**b)** D283-Med cells were treated with STAT3 inhibitor NSC 74859 (200  $\mu$ M), CQ (40  $\mu$ M) alone or in combination for 48h. Levels of p-STAT3 (Y705), STAT3, c-MYC, CYCLIN D2, PARP and ACTIN were analysed by WB.

**c)** D283-Med cells were treated as in **(b)** for different time periods and proliferation was monitored by MTS assay (upper panel) Data are expressed as the mean  $\pm$  SEM (n= 6) and data were analysed by one-way analysis of variance (ANOVA) followed by Tukey post-hoc test. (\*p<0.05; \*\*p<0.01; \*\*\*p<0.001). Apoptosis was evaluated by flow-cytometry measuring Annexin V-Propidium iodure positive cells (bottom panel). Data are expressed as the mean  $\pm$  SEM (n= 3) and data were analysed by one-way analysis of variance (ANOVA) followed by Tukey post-hoc test. (\*p<0.05; \*\*\*p<0.001).

**d)** D283-Med cells were treated with WP1066 (10  $\mu$ M, 48h) in the presence of CQ for 1 h. Levels of LC3 and ACTIN were analysed by WB. Densitometric analysis of LC3II levels over ACTIN is also shown (right panel). Data are expressed as the mean  $\pm$  SEM (n= 3) and data were analysed by one-way analysis of variance (ANOVA) followed by Tukey post-hoc test. (\*p<0.05).

**e)** WB analyses of p-STAT3 (Y705), c-MYC, CYCLIN D2 and ACTIN were performed in cerebellar tumours obtained from mice shown in Fig. 8d.

**f)** WB analyses of c-Myc and Ambra1 were performed in both normal cerebellum and tumours obtained from mice shown in Fig. 8g. Data are expressed as the mean  $\pm$  SEM (n=4) and were analysed by unpaired Student's t-test (\*p<0.05).



**Table S1: Clinical features of the patients included in this study**

The tumour samples were from patients enrolled at Bambino Gesù Pediatric Hospital between 2010 and 2018

| <b>Characteristic</b>     | <b>Measure</b>        | <b>N°</b> | <b>Total Population n (%) / datum</b> |
|---------------------------|-----------------------|-----------|---------------------------------------|
| Total Patients            |                       | 47        |                                       |
| Age at diagnosis (years)  | Median                | 6,7       |                                       |
|                           | Range                 | 0.5 - 16  |                                       |
| Gender                    | Male                  | 24        |                                       |
|                           | Female                | 23        |                                       |
|                           | Male/Female ratio     |           |                                       |
| Histopathological variant | Classic               | 30        | 63,82 %                               |
|                           | Large cell/anaplastic | 10        | 21,27 %                               |
|                           | Desmoplastic/Nodular  | 7         | 14,89 %                               |
| Molecular subtype         | WNT                   | 8         | 17,39%                                |
|                           | SHH                   | 9         | 19,57%                                |
|                           | G3                    | 13        | 28,26%                                |
|                           | G4                    | 16        | 34,78%                                |
| Status                    | Alive                 | 34        |                                       |
|                           | Dead of disease       | 13        |                                       |

SUPPLEMENTARY TABLE S1: PRIMERS qPCR

| Name          | species | FW                             | RW                             |
|---------------|---------|--------------------------------|--------------------------------|
| AMBRA1        | H       | 5'-AACCCCTCACTGCGAGTTGA-3'     | 5'-TCTACCTGTTCCGTGGTTCTCC-3';  |
| B2M           | H       | 5'-CTCCGTGGCCTTAGCTGTC-3'      | 5'- TCTCTGCTGGATGACGTGAG-3     |
| CD133         | H       | 5'-CAGAGTACAACGCCAAACCA-3'     | 5'- AAATCACGATGAGGGTCAGC-3';   |
| C-MYC         | H       | 5'-TCTCCTTGCGAGCTGCTTAG-3'     | 5'- GTCGTAGTCGAGGTCATAG-3';    |
| STAT3         | H       | 5'-ACATTCTGGGCACAAACAC-3'      | 5'- CTCAGTCACAATCAGGGAAG-3'    |
| FOXO3A        | H       | 5'-AGATCTACGAGTGGATGGTG-3'     | "5'-CTTGCCAGTTCCTCATTTC-3"; "  |
| OCT-4         | H       | 5'-TCTAGAAGTTAGGTGGGCAG-3'     | "5'-CAATCTCCCCTTTCATTTCG       |
| SOX2          | H       | 5'-AGCTACAGCATGATGCAGGA-3',    | "5'-GGTCATGGAGTTGTACTGCA-3';   |
| NANOG         | H       | 5'-TGAACCTCAGCTACAAACAG-3'     | "5'-TGGTGGTAGGAAGAGTAAAG-3';   |
| B-III TUBULIN | H       | 5'-CTCAGGGGCCTTTGGACATC-3'     | "5'-CAGGCAGTCGCAGTTTTTCAC      |
| ATG13         | H       | 5'-CCCAGGACAGAAAGGACCTG-3'     | 5'-AACCAATCTGAACCCGTTGG-3'     |
| GFAP          | H       | 5'-TGGAAAGCCGAGAAACACT-3'      | 5'-CCTCCAGCGACTCAATCTTC-3'     |
| SYP           | H       | 5'-CCTCCAGCGACTCAATCTTC-3'     | 5'-AGCCTGTCTCCTTAAACACGAA-3'   |
| SNAIL         | H       | 5'-GCTGCAGGACTCTAATCCAG-3'     | 5'-ATCTCCGGAGGTGGGATG-3'       |
| VIMENTIN      | H       | 5'-TACAGGAAGCTGCTGGAAGG-3'     | 5'-ACCAGAGGGAGTGAATCCAG-3'     |
| P62           | H       | 5'-GGAGCAGATGAGGAAGATCG-3'     | 5'-TGGGTCCAGTCATCATCTCC-3'     |
| MIZ-1         | H       | 5'-CATGTCTTGGAACAGCTGAA-3'     | 5'-GCACTGCTTTATGAGCCTTA-3'     |
| GADPH         | H       | 5'-GCGAGATCCCTCCAAAATCAA-3'    | 5'-GTTACACCCATGACGAAACAT-3'    |
| CYCLIN D2     | H       | 5'-CACCGACTTTAAGTTTGCCA-3'     | 5'-TTGGTGATCTTAGCCAGCAG-3'     |
| BECLIN1       | H       | 5'-AAGAGTTGAGAAAGGCGAG-3'      | 5'-TGGGTTTTGATGGAATAGGAGC-3'   |
| NESTIN        | H       | 5'-ATCGCTCAGGTCCTGGAA-3'       | 5'-AAGCTGAGGGAAGTCTTGGA-3'     |
| SOCS3         | H       | 5'-CCTATGAGAAAGTCACCCAG-3'     | 5'-TGTGCTTGTGCCATGTG-3'        |
| ATG7          | H       | 5'-TGAGTTGACCCAGAAGAAGCT-3'    | 5'-CCCAGCAGAGTCACCATTGT-3'     |
| ATG5          | H       | 5'-ATGTGCTTCGAGATGTGGT-3'      | 5'-AGTATGGTCTGCTCCCTTCA-3'     |
| WIPI2         | H       | 5'-AATGCACCGATACGGAAGAT-3'     | 5'-GCAAACCTTTAGCTTCCTTGG-3'    |
| LC3           | H       | 5'-GATGTCGACTTATTCGAGAGC-3'    | 5'-TTGTTTTATCCAGAACAGGAAAGC-3' |
| ACTINA        | H       | 5'-GTACCACTGGCATCGTGATGGACT-3' | 5'-CCGCTCATTCCAATGGTGAT-3'     |
| ULK1          | H       | 5'-CAAGCTGCCGACTTCT-3'         | 5'-CTGGGAGCTGGGGGTCTT-3'       |
